# Supplementary material
Source: PubMed Central journal article supplement (PMC4649662)
Supplement: 10.1534_115.181479_genetics.115.181479-2.pdf [file 10.1534_115.181479_genetics.115.181479-2.pdf]

Figure S2

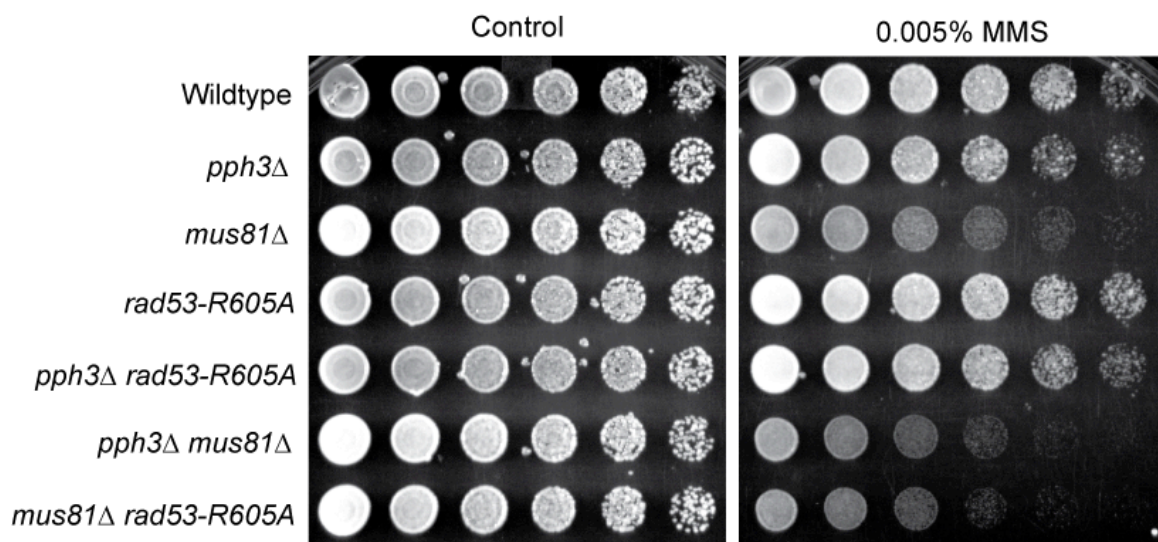

**Figure S2 Effect of the presence of the *rad53-R605A* allele on the MMS sensitivity of indicated strains lacking.** Four-fold serial dilutions were spotted on YPD plates and grown for 2–3 days at 30°C.
